# Supplementary material
Source: PubMed Central journal article supplement (PMC6989151)
Supplement: NIHMS1066096-supplement-Table_of_materials.pdf [file NIHMS1066096-supplement-Table_of_materials.pdf]

Materials List for:

## Co-staining Blood Vessels and Nerve Fibers in Adipose Tissue

Xin Li<sup>1</sup>, Zhengmei Mao<sup>2</sup>, Li Yang<sup>1</sup>, Kai Sun<sup>1</sup>

<sup>1</sup>Center for Metabolic and Degenerative Diseases, the Brown Foundation of Institute of Molecular Medicine, University of Texas Health Science Center at Houston

<sup>2</sup>Microscopy Core, the Brown Foundation of Institute of Molecular Medicine, University of Texas Health Science Center at Houston

Correspondence to: Kai Sun at [Kai.Sun@uth.tmc.edu](mailto:Kai.Sun@uth.tmc.edu)

URL: <https://www.jove.com/video/59266>

DOI: [doi:10.3791/59266](https://doi.org/10.3791/59266)

### Materials

| Name                                                                                   | Company                       | Catalog Number  | Comments                                                                                                                                          |
|----------------------------------------------------------------------------------------|-------------------------------|-----------------|---------------------------------------------------------------------------------------------------------------------------------------------------|
| Alexa Fluor 488 AffiniPure Bovine Anti-Goat IgG (H+L)                                  | Jackson ImmunoResearch        | 805-545-180     | Lot: 116969                                                                                                                                       |
| Alexa Fluor 647 AffiniPure Donkey Anti-Rabbit IgG (H+L)                                | Jackson ImmunoResearch        | 711-605-152     | Lot: 121944                                                                                                                                       |
| Amira 6.0                                                                              | Thermo Fisher Scientific      |                 | Licensed software                                                                                                                                 |
| Angio tool                                                                             | National Institutes of Health |                 | Open source software<br><a href="https://ccrod.cancer.gov/confluence/display/ROB2/Home">https://ccrod.cancer.gov/confluence/display/ROB2/Home</a> |
| Anti-mouse endomucin antibody                                                          | R&D research system           | AF4666          | Lot: CAAS0115101                                                                                                                                  |
| Anti-tyrosine hydroxylase antibody                                                     | Pel Freez Biologicals         | P40101-150      | Lot: aj01215y                                                                                                                                     |
| Cover glasses high performance, D=0.17mm                                               | Zeiss                         | 474030-9020-000 |                                                                                                                                                   |
| Cytoseal 280                                                                           | Thermo Fisher Scientific      | 8311-4          | High-viscosity medium                                                                                                                             |
| Glycerol                                                                               | Fisher                        | G33-500         |                                                                                                                                                   |
| Paraformaldehyde, 16%                                                                  | TED PELLA                     | 170215          |                                                                                                                                                   |
| Press-to-Seal Silicone Isolator with Adhesive, eight wells, 9 mm diameter, 1.0 mm deep | INVITROGEN                    | P24744          | Silicone isolator                                                                                                                                 |
| ProLong Diamond Antifade Mountant                                                      | Thermo Fisher Scientific      | P36965          | Mounting medium                                                                                                                                   |
| SEA BLOCK Blocking Buffer                                                              | Thermo Fisher Scientific      | 37527X3         |                                                                                                                                                   |
| Sodium azide                                                                           | Sigma-Aldrich                 | S2002-100G      |                                                                                                                                                   |
| Tissue Path IV Tissue Cassettes                                                        | Thermo Fisher Scientific      | 22-272416       |                                                                                                                                                   |
| Triton X-100                                                                           | Sigma-Aldrich                 | X100            | Generic term: octoxynol-9                                                                                                                         |
| Tube rotator and rotisseries                                                           | VWR                           | 10136-084       |                                                                                                                                                   |
| Tween-20                                                                               | Sigma-Aldrich                 | P1379           | Generic term: Polysorbate 20                                                                                                                      |
